# Supplementary material for: 6,8-(1,3-Diaminoguanidine) luteolin and its Cr complex show hypoglycemic activities and alter intestinal microbiota composition in type 2 diabetes mice
Source: Royal Society of Chemistry journal article supplement (doi:10.1039/d2fo00021k), 2022-01-01
Supplement: d2fo00021k1.pdf [file d2fo00021k1.pdf]

## Supporting Information

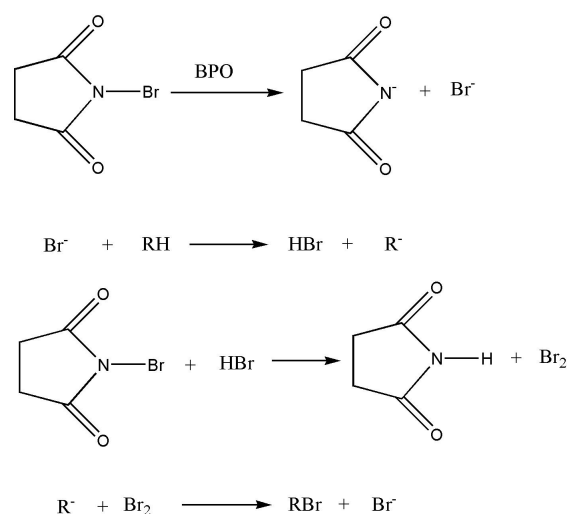

Fig. S1 The mechanism of bromine free radical reaction.

### Part I: The characterization results of DAGL and DAGL.Cr

DAGL was obtained by C-N cross-coupling reaction of 6, 8-bromoluteolin boric acid complex at C6 and C8 positions and deborax protection. FT-IR (KBr  $\text{cm}^{-1}$ ) (Fig. S2A): 3437.65(O-H), 1665.38(C=O), 1611.67(C=C(Ar)), 1262.87(C-N(Ar)), 1123.2(C-N), 803.51(N-H), and the wavenumber of  $1262.87\text{cm}^{-1}$  indicated that the amino group on aminoguanidine had been connected to the C6 and C8 positions of 6, 8-bromoluteolin. Furthermore, HRMS (ESI, positive mode) calcd for  $\text{C}_{17}\text{H}_{20}\text{N}_{10}\text{O}_6^+$  461.1646, found  $\text{C}_{17}\text{H}_{20}\text{N}_{10}\text{O}_6^+$  461.1642(Fig. S2B), indicating that DAGL had been synthesized. Finally, the C5 hydroxyl group on DAGL complexed with chromium acetate, FT-IR (KBr  $\text{cm}^{-1}$ ) (Fig. S3A): 3420.12(O-H), 1624.09(C=O), 1570.91(C=C(Ar)), 1256.5(C-N(Ar)), 1125.45(C-N), and 811.83(N-H). Compared with 1665.38(C=O) of DAGL, 1624.09(C=O) of DAGL.Cr was found to be red shifted and the absorption peak became weaker, owing to a coordination effect between the C4 position carbonyl group and Cr(III). As a result, DAGL.Cr moved

from  $1665.38\text{cm}^{-1}$  to  $1624.09\text{cm}^{-1}$ . It also indicated that oxygen in the carbonyl group participated in the coordination reaction. The electron cloud of the carbonyl group deviated from the geometric center of the bond and moved to the oxygen atom after being coordinated with Cr(III), decreasing the carbonyl group's double-bond character. Furthermore, the vibration absorption peak of the C=C(Ar) skeleton on DAGL.Cr became weaker than  $1611.67(\text{C}=\text{C}(\text{Ar}))$  of DAGL and red shifted to  $1570.91\text{cm}^{-1}$ , which showed that the formation of DAGL.Cr complex enhanced the conjugation effect of the benzene ring. Meanwhile, in Fig. S3B, the UV-vis maximum absorption wavelengths of DAGL in ethanol were 266 and 356 nm, while DAGL.Cr were 285 and 454 nm. Both the peaks of DAGL.Cr were red shifted when DAGL was complexed with chromium acetate, and this red shift was caused by the C5 hydroxyl oxygen substitution of the DAGL<sup>[21]</sup>. Furthermore, the changes in the surface morphology of DAGL and DAGL.Cr was also observed by SEM (Fig. S3C-D). DAGL has a smooth surface, whereas the surface of DAGL.Cr had a distinct rough and complex conformation. We hypothesized that the irregular and fluffy surface morphology of DAGL.Cr is due to the complex interaction between Cr(III) and DAGL.

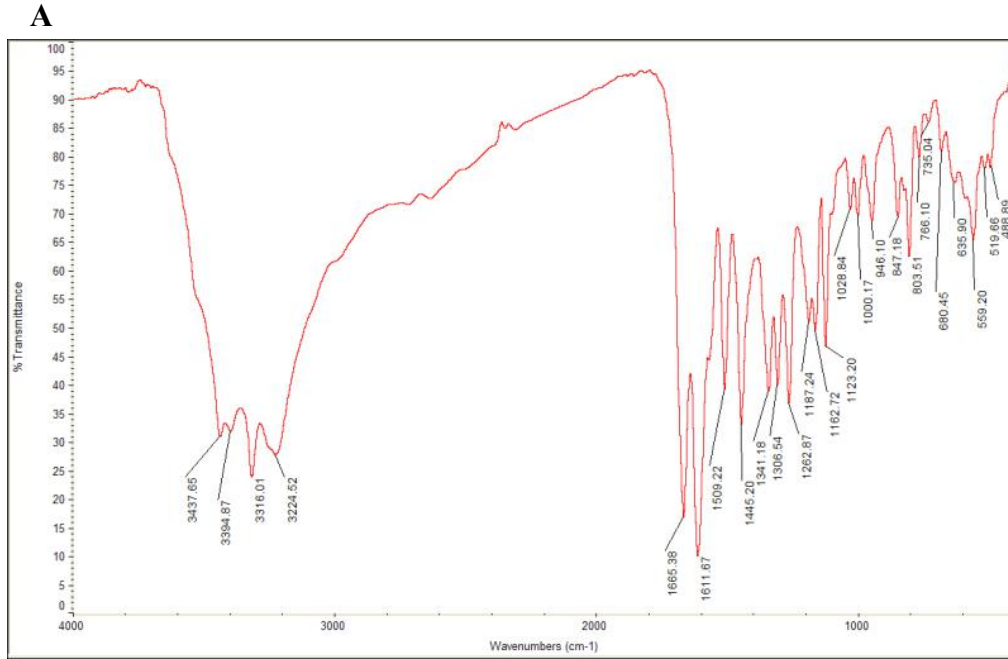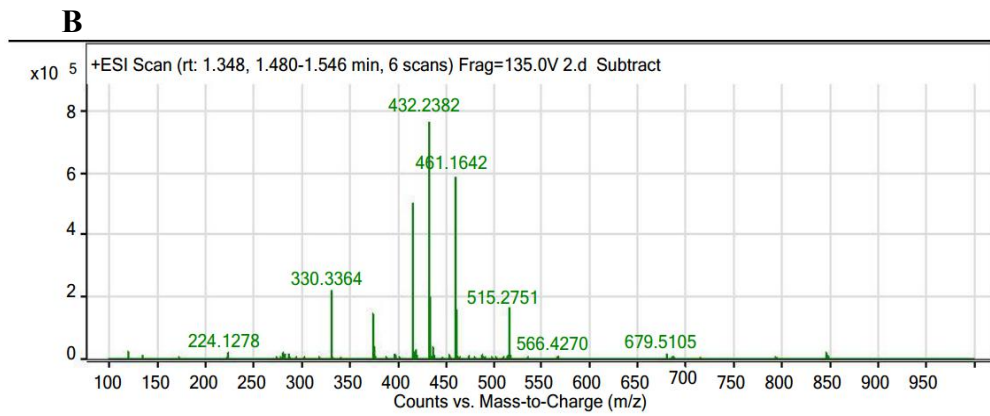

Fig. S2 The FT-IR spectra and HRMS figure of DAGL. (A) FT-IR; (B) HRMS.

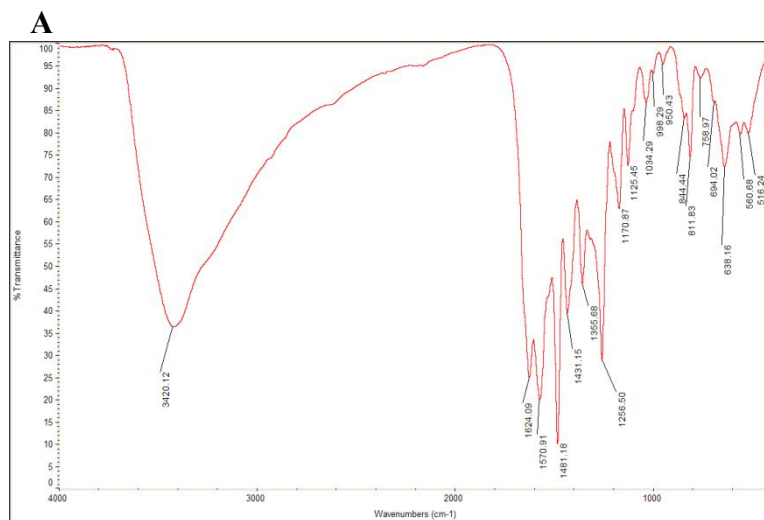

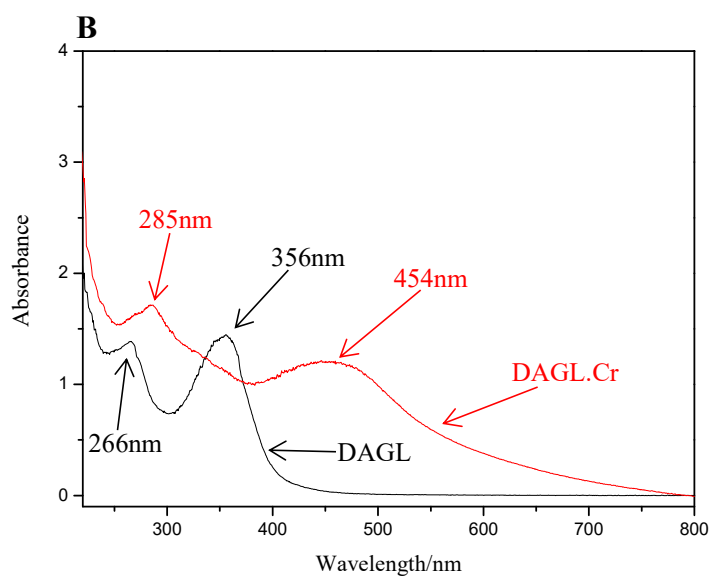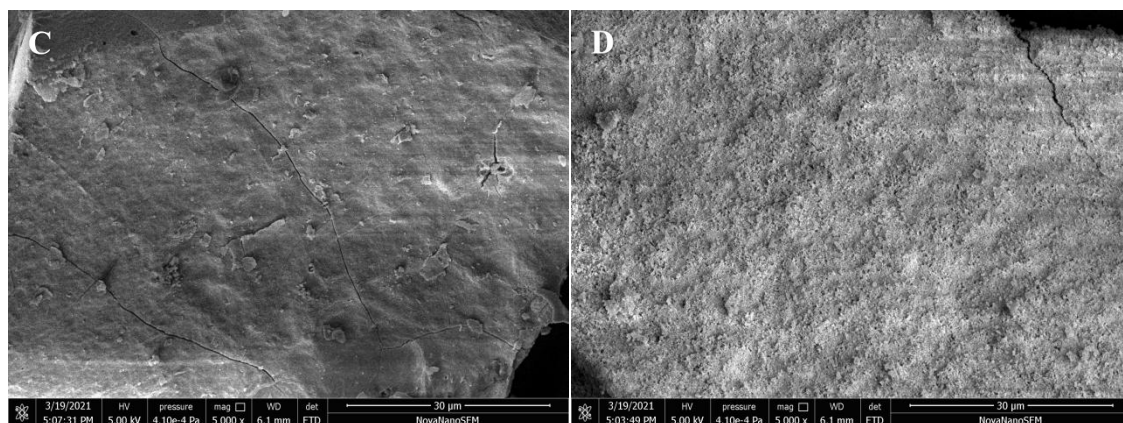

Fig. S3 (A) The FT-IR spectra of DAGL.Cr; (B) The UV-Vis spectra of DAGL and DAGL.Cr; The SEM images of DAGL(C: magnification 5000×) and DAGL.Cr(D: magnification 5000×)

Table S1 The correlation r value between caecum microbiota genus and hypoglycemic correlation parameters

|                        | S_GSP        | S_TC         | S_TG         | S_LDL_C      | S_HDL_C      | L_TC         | L_TG         | L_LDL_C      | L_HDL_C      | Bodyweight   | FBG          | AUC          |
|------------------------|--------------|--------------|--------------|--------------|--------------|--------------|--------------|--------------|--------------|--------------|--------------|--------------|
| Akkermansia            | 0.205353887  | 0.216213556  | 0.044988234  | 0.602678807  | -0.504158082 | 0.200201722  | 0.274093467  | 0.314437694  | -0.283319729 | -0.256375777 | -0.004042576 | 0.032577686  |
| Dubosiella             | 0.040012004  | 0.10984815   | -0.090454684 | 0.686750369  | -0.566165743 | 0.264462877  | 0.093248017  | 0.107137215  | -0.153468982 | -0.038531559 | -0.078971926 | -0.001889607 |
| Alloprevotella         | -0.160204206 | -0.325756655 | 0.047240904  | 0.130718426  | 0.171305863  | 0.148529293  | 0.227453205  | 0.200551522  | 0.110120736  | 0.242038733  | -0.162587134 | -0.220160441 |
| Weissella              | 0.137608041  | 0.156507348  | 0.025711749  | 0.066720771  | 0.210934106  | -0.418606736 | -0.124503263 | 0.016072733  | -0.28623584  | -0.377078612 | 0.291254337  | 0.212182759  |
| Intestinimonas         | -0.096044741 | -0.119995139 | 0.002512461  | 0.012077491  | 0.348922034  | -0.089557079 | 0.18049196   | 0.264590226  | -0.11071038  | -0.408477538 | 0.04385716   | 0.039226811  |
| Lactococcus            | 0.045876797  | 0.076258513  | 0.056542585  | -0.057036255 | 0.210724987  | -0.383548556 | -0.308428851 | -0.031176424 | -0.105702997 | -0.216760098 | 0.228781331  | 0.16102874   |
| Oscillibacter          | -0.020462742 | -0.129908019 | 0.125526743  | 0.35709365   | 0.161027594  | 0.109643436  | 0.371555917  | 0.428710576  | -0.047649919 | -0.175688817 | 0.046121424  | 0.041815235  |
| Parasutterella         | 0.089053186  | -0.091732088 | 0.038314859  | 0.5400454    | -0.221861766 | 0.402955428  | 0.307005928  | 0.270046436  | 0.026787931  | 0.116568089  | -0.17290537  | -0.125578575 |
| Enterococcus           | -0.173052176 | -0.077069907 | 0.011282025  | -0.037908966 | 0.213190216  | -0.431233096 | -0.366544073 | -0.071321256 | -0.002110307 | -0.188791301 | 0.029957408  | 0.011038528  |
| Desulfovibrio          | 0.222294258  | 0.358928644  | 0.093598055  | 0.225067877  | -0.304064184 | 0.160291735  | 0.085656402  | 0.205758368  | -0.231037278 | -0.320421395 | 0.264286297  | 0.340356565  |
| Alistipes              | -0.281512095 | -0.425185366 | -0.242362856 | -0.399529968 | 0.562619019  | -0.376711774 | 0.151932582  | -0.029438011 | 0.088242444  | 0.100234989  | 0.086237642  | -0.012073576 |
| Muribaculum            | 0.087277147  | -0.274797407 | 0.035249787  | 0.03541616   | 0.2160859    | -0.045379037 | 0.289372392  | 0.155143795  | 0.063368583  | 0.191807463  | 0.004863222  | -0.184757506 |
| Bacteroides            | -0.141323285 | -0.468376484 | -0.124868325 | 0.05924065   | 0.361654714  | -0.030872701 | 0.160845961  | -0.025545382 | 0.198606272  | 0.260351673  | -0.172799486 | -0.364070983 |
| Lactobacillus          | 0.033953243  | 0.260200154  | -0.141884774 | -0.123748937 | -0.251610551 | -0.161170083 | -0.403289847 | -0.372800382 | 0.02050077   | 0.005591119  | -0.047495544 | 0.026983227  |
| Ruminiclostridium      | -0.257212318 | -0.338330632 | -0.022365382 | 0.096118     | 0.396515397  | -0.039544589 | 0.273813865  | 0.312801682  | 0.040111827  | -0.115959645 | 0.012563323  | -0.062153073 |
| Butyricoccus           | -0.171192353 | -0.09062171  | -0.118338404 | 0.070646888  | 0.156277868  | 0.033961501  | -0.17037488  | -0.020928821 | 0.237487345  | -0.098885516 | -0.188819977 | -0.141925031 |
| Lachnoclostridium      | 0.34552895   | 0.513188283  | 0.319828215  | 0.068560315  | -0.321785989 | 0.122437404  | 0.092942225  | 0.143297428  | -0.389838749 | -0.419495989 | 0.385070525  | 0.514788105  |
| Helicobacter           | -0.147499798 | -0.057379042 | -0.117914017 | 0.256281407  | -0.061026015 | 0.161270717  | 0.188662427  | -0.027089507 | -0.039466753 | -0.066210139 | -0.03319418  | -0.161513839 |
| Erysipelatoclostridium | 0.120257788  | 0.28023672   | -0.132047186 | 0.363275244  | -0.324456891 | 0.274145846  | 0.121022989  | -0.036263339 | -0.1420176   | -0.203299166 | 0.013540358  | -0.018076441 |
| Enterorhabdus          | 0.064435079  | 0.328335229  | -0.085909958 | -0.052605982 | -0.249635276 | -0.03614702  | -0.330429151 | -0.173013781 | -0.059893829 | -0.269724851 | 0.046127032  | 0.116626821  |
| Blautia                | 0.034038415  | -0.111840506 | 0.138255198  | 0.106013941  | -0.162047168 | 0.166862516  | 0.228858545  | 0.295713603  | 0.191823009  | -0.055107582 | 0.035342277  | 0.154544351  |
| Roseburia              | -0.055674865 | 0.009765388  | 0.227147489  | 0.440936905  | -0.302524414 | 0.434602919  | 0.142058347  | 0.187104673  | -0.108103728 | 0.09821718   | -0.114047177 | 0.025445705  |
| Parabacteroides        | 0.097252614  | -0.076464868 | -0.027148588 | 0.430175069  | -0.163546479 | 0.233964101  | 0.374650515  | 0.167808953  | 0.007779894  | 0.129421777  | -0.166497792 | -0.162810488 |
| Mucispirillum          | 0.066661264  | -0.038983669 | 0.155036877  | 0.147112462  | 0.098391215  | -0.026015074 | 0.236080723  | 0.404980213  | -0.081854284 | -0.257557342 | 0.236178665  | 0.184617881  |

Table S1 The correlation r value between caecum microbiota genus and hypoglycemic correlation parameters (continued)

|                        | HOMA_ISI     | HOMA_IRI     | HOMA_beta    | IL_6         | IL_10        | PI3K         | AKT_1        | mTOR         | GSK_3beta    | GLUT_4       | S6K1         | IRS_1        |
|------------------------|--------------|--------------|--------------|--------------|--------------|--------------|--------------|--------------|--------------|--------------|--------------|--------------|
| Akkermansia            | -0.177013594 | 0.172033046  | -0.159295905 | 0.224614574  | -0.094793719 | 0.065040806  | 0.158806015  | 0.332145434  | 0.290014892  | 0.350189716  | -0.118961627 | 0.362926857  |
| Dubosiella             | -0.02185372  | -0.014952545 | -0.064246651 | 0.304801887  | -0.137201928 | 0.1421897    | 0.15067565   | 0.273993071  | 0.336350115  | 0.345223054  | 0.079692138  | 0.317782668  |
| Alloprevotella         | 0.096183454  | 0.012721822  | -0.176890041 | -0.424681954 | 0.064743538  | 0.592730666  | 0.420630419  | 0.49939227   | -0.363584799 | 0.657078033  | -0.029414148 | 0.583015963  |
| Weissella              | -0.327033978 | 0.279098194  | -0.242598866 | -0.045664715 | -0.268472834 | -0.426526214 | -0.355260124 | -0.299943365 | 0.035688232  | -0.300024475 | -0.127585428 | -0.313975329 |
| Intestinimonas         | -0.149856144 | 0.162823685  | -0.227337201 | -0.445191888 | -0.195242538 | 0.038096782  | -0.103578233 | 0.185516882  | -0.279369459 | 0.233172595  | -0.294444225 | 0.239656365  |
| Lactococcus            | -0.155836882 | 0.133446991  | -0.157297092 | 0.054757884  | -0.214975396 | -0.287736954 | -0.252373003 | -0.272004718 | 0.034801677  | -0.387604696 | 0.111543838  | -0.427760477 |
| Oscillibacter          | -0.162317667 | 0.250648299  | -0.355348461 | -0.328200974 | -0.247974069 | 0.475989788  | 0.182009725  | 0.396353324  | -0.198055106 | 0.481766614  | -0.285980552 | 0.486790925  |
| Parasutterella         | 0.068674515  | -0.037908982 | -0.06420986  | -0.039288966 | -0.054225267 | 0.51922134   | 0.301242464  | 0.539411527  | 0.144573654  | 0.598426151  | 0.080850847  | 0.584139254  |
| Enterococcus           | -0.039771168 | -0.081977306 | 0.064689023  | -0.084249944 | -0.052838838 | -0.189341893 | -0.138306267 | -0.127024241 | -0.070289452 | -0.222312714 | 0.178158601  | -0.280751982 |
| Desulfovibrio          | -0.207212318 | 0.286385738  | -0.269124798 | 0.427633713  | -0.356482983 | -0.221339709 | -0.419367911 | -0.21102107  | 0.316207456  | -0.429983794 | -0.244813615 | -0.367747165 |
| Alistipes              | 0.11174135   | -0.011101207 | -0.033951868 | -0.55757232  | 0.240256057  | 0.07933871   | 0.195365043  | 0.05469573   | -0.627258731 | 0.18466899   | -0.084190908 | 0.2131918    |
| Muribaculum            | -0.046594546 | 0.076171954  | -0.154774928 | -0.356954743 | 0.029739476  | 0.281222142  | 0.194562619  | 0.301203355  | -0.308253313 | 0.375268425  | -0.085166728 | 0.431181881  |
| Bacteroides            | 0.129730168  | -0.077060206 | -0.048213273 | -0.498419901 | 0.202171623  | 0.568904741  | 0.541204116  | 0.522404991  | -0.420954542 | 0.551251924  | 0.138967669  | 0.571995786  |
| Lactobacillus          | 0.080463496  | -0.147232801 | 0.287577992  | 0.436188315  | 0.049671826  | -0.471818148 | -0.269751236 | -0.350457824 | 0.376873835  | -0.54622802  | 0.240904303  | -0.488210032 |
| Ruminiclostridium      | -0.034196345 | 0.143106033  | -0.271220777 | -0.513512419 | -0.009318909 | 0.457897724  | 0.294315466  | 0.379482193  | -0.448442122 | 0.442688708  | -0.215631458 | 0.498602164  |
| Butyrivibrio           | 0.193394131  | -0.242593728 | 0.167456947  | -0.212765966 | 0.067517733  | -0.009079118 | 0.150516723  | 0.164620067  | -0.009240122 | 0.191529896  | 0.041499495  | 0.182208721  |
| Lachnospirillum        | -0.406693137 | 0.31123896   | -0.296005186 | 0.515760473  | -0.331982821 | -0.570363471 | -0.347054534 | -0.58269184  | 0.394700592  | -0.516246657 | -0.327120979 | -0.527753018 |
| Helicobacter           | 0.138984563  | -0.144576362 | 0.061914989  | -0.123748937 | 0.089955023  | 0.049278651  | 0.088334212  | 0.262571419  | 0.01013007   | 0.29879655   | 0.002188095  | 0.248389321  |
| Erysipelatoclostridium | -0.004863616 | -0.083248901 | 0.107810164  | 0.212540038  | 0.040692257  | -0.372192958 | -0.021156731 | 0.064767159  | 0.343776621  | 0.133425211  | 0.019940827  | 0.10959349   |
| Enterorhabdus          | 0.007942619  | -0.13332253  | 0.228552908  | 0.396239421  | -0.02796126  | -0.629772232 | -0.420310419 | -0.36690036  | 0.427037331  | -0.521862474 | 0.114357501  | -0.492847601 |
| Blautia                | -0.004457231 | -0.009400705 | -0.097005552 | -0.038089064 | -0.062239151 | 0.10593289   | 0.157623892  | 0.147007578  | -0.019206613 | 0.222051138  | -0.186636413 | 0.191336765  |
| Roseburia              | -0.030388979 | 0.053403566  | -0.197163696 | 0.172366289  | -0.308833064 | 0.530818171  | 0.147893031  | 0.250810374  | 0.22382496   | 0.328200974  | 0.036952999  | 0.281847651  |
| Parabacteroides        | 0.038818429  | -0.009400705 | -0.063941003 | -0.051055554 | 0.068722396  | 0.374209758  | 0.444264358  | 0.433810125  | 0.02739171   | 0.556748657  | 0.009724867  | 0.547753154  |
| Mucispirillum          | -0.209984604 | 0.218007945  | -0.240132915 | -0.170435208 | -0.287543565 | 0.112259372  | -0.125617961 | 0.08914823   | -0.148472325 | 0.126266312  | -0.334792127 | 0.105600131  |

Table S2 The correlation r value between caecum microbiota genus and fecal SCFA

|                        | Acetic acid  | Propionic acid | Isobutyric acid | Butyric acid | Isovaleric acid | Valeric acid | SCFA         |
|------------------------|--------------|----------------|-----------------|--------------|-----------------|--------------|--------------|
| Akkermansia            | -0.204169938 | -0.042620432   | -0.286037302    | -0.166236014 | -0.008981317    | -0.331410599 | -0.156519862 |
| Dubosiella             | -0.059648285 | 0.037627834    | -0.195138315    | -0.115676835 | -0.040421167    | -0.234804257 | -0.010433919 |
| Alloprevotella         | 0.386289049  | 0.286119439    | 0.067909238     | 0.024390244  | 0.420144235     | 0.365853659  | 0.386921643  |
| Weissella              | -0.203106711 | -0.334252734   | -0.145076307    | 0.003406604  | -0.149160587    | -0.212588307 | -0.15483826  |
| Intestinimonas         | 0.086926569  | 0.032094664    | 0.166808512     | 0.04773676   | 0.27596548      | 0.069619485  | 0.226364636  |
| Lactococcus            | -0.070133494 | -0.240447953   | -0.078249273    | 0.075687564  | -0.095887139    | -0.132635763 | -0.039669045 |
| Oscillibacter          | 0.177154666  | 0.038654781    | -0.06345733     | 0.00267423   | 0.228525122     | 0.134035657  | 0.257536468  |
| Parasutterella         | 0.198401082  | 0.284601477    | -0.057639311    | -0.058933449 | 0.163731083     | 0.104635283  | 0.183781444  |
| Enterococcus           | 0.023944837  | -0.126131419   | -0.062786718    | 0.14439369   | -0.004058282    | -0.105190682 | 0.071425772  |
| Desulfovibrio          | -0.245066656 | -0.266450568   | -0.052435368    | 0.092706645  | -0.22471637     | -0.368719612 | -0.126175041 |
| Alistipes              | 0.208257364  | 0.033789806    | -0.017179903    | 0.169435216  | 0.261810226     | 0.379142695  | 0.179483024  |
| Muribaculum            | 0.24076175   | 0.128276812    | 0.037319178     | -0.043515255 | 0.325999757     | 0.282808638  | 0.16312143   |
| Bacteroides            | 0.459705847  | 0.277368123    | 0.146839547     | 0.142370959  | 0.438457175     | 0.392431732  | 0.414147962  |
| Lactobacillus          | -0.246667477 | -0.102503849   | 0.004132901     | 0.128757799  | -0.299408476    | -0.274288956 | -0.252086541 |
| Ruminiclostridium      | 0.29465154   | 0.162959362    | -0.01872037     | 0.119606175  | 0.3353997       | 0.25930878   | 0.363923666  |
| Butyricicoccus         | 0.144524605  | 0.201985824    | 0.109998786     | 0.140790279  | 0.093617025     | 0.053090174  | 0.132765963  |
| Lachnoclostridium      | -0.578339614 | -0.452880642   | -0.297811994    | -0.321286768 | -0.523215299    | -0.504416174 | -0.492747751 |
| Helicobacter           | 0.111516331  | 0.154058107    | -0.086841999    | -0.087361725 | 0.022448236     | 0.085254671  | -0.016694356 |
| Erysipelatoclostridium | -0.291423491 | -0.070360318   | -0.243524796    | -0.389656736 | -0.278685221    | -0.341831174 | -0.332022881 |
| Enterorhabdus          | -0.287972122 | -0.107387448   | -0.076028369    | 0.04943875   | -0.356121092    | -0.320784543 | -0.296065168 |
| Blautia                | -0.023867412 | -0.01880141    | -0.290067675    | -0.06069938  | 0.085659873     | -0.060051056 | -0.150411282 |
| Roseburia              | 0.176182179  | 0.139951378    | 0.094416079     | 0.0636953    | 0.00089141      | 0.033873582  | 0.245056727  |
| Parabacteroides        | 0.097293136  | 0.137606873    | -0.221015521    | -0.223347787 | 0.091089591     | 0.066858463  | 0.026581304  |
| Mucispirillum          | 0.070146291  | -0.131047899   | -0.310585185    | 0.015398331  | 0.03476781      | 0.123429777  | -0.06848205  |
